# Supplementary material
Source: PubMed Central journal article supplement (PMC3746918)
Supplement: 1311565110_pnas.201311565SI.pdf [file 1311565110_pnas.201311565SI.pdf]

# Supporting Information

Panigrahy et al. 10.1073/pnas.1311565110

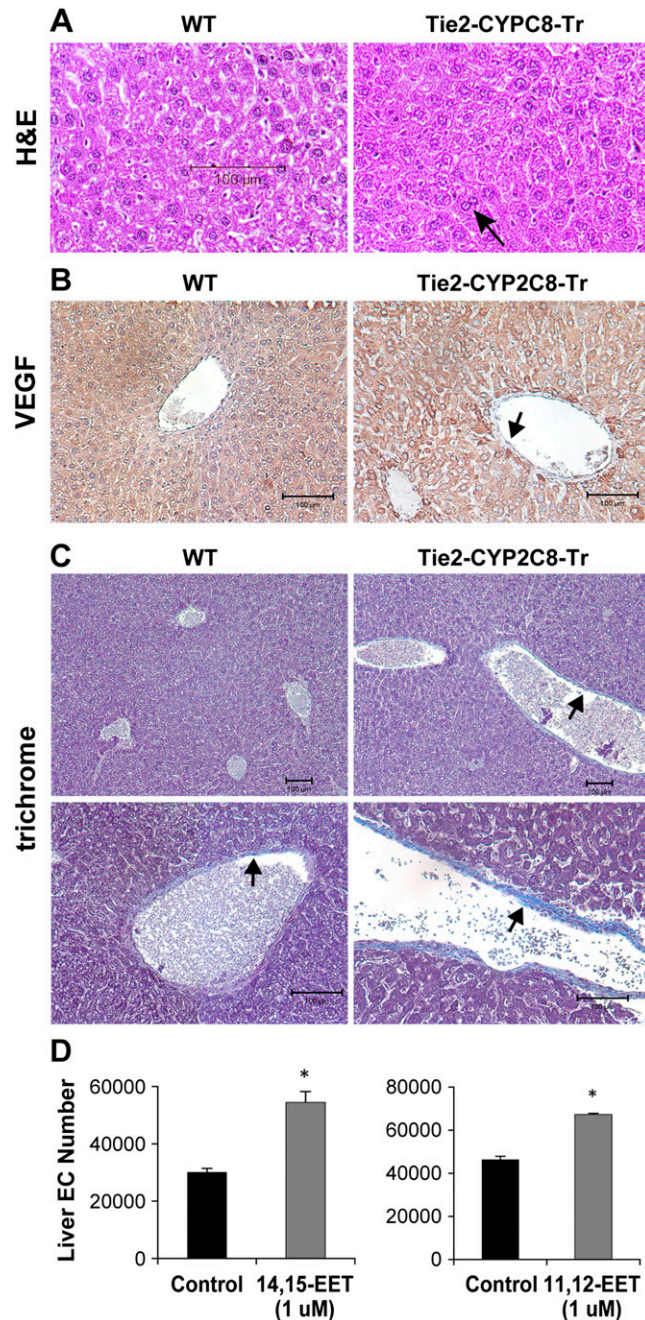

**Fig. S1.** Endothelial-derived epoxyeicosatrienoic acids (EETs) promote liver, kidney, and lung regeneration. (A) Histological analysis of the Tie2-CYP2C8-Tr livers on day 4 after partial hepatectomy revealed increased hepatocyte proliferation characterized by thickening of the hepatocyte cords, multinucleation, and increased nuclear size, features that are typical of dividing cells in a regenerating liver, compared with WT mice. Arrow points to multinucleated hepatocytes in liver from Tie2-CYP2C8-Tr mice. (Scale bar, 100  $\mu$ m.) (B) Immunohistochemistry reveals increased VEGF expression (brown staining) in livers from Tie2-CYP2C8-Tr mice on day 4 after partial hepatectomy compared with WT mice. (Scale bars, 100  $\mu$ m.) (C) Trichrome staining reveals increased collagen deposition (blue staining) in livers from Tie2-CYP2C8-Tr on day 4 after partial hepatectomy compared with WT mice. (Magnification: Upper, 10 $\times$ ; Lower, 20 $\times$ .) (Scale bar, 100  $\mu$ m.) (D) The 14,15- and 11,12-EET stimulate liver endothelial cell proliferation.  $n = 3$  or 4 per group. \* $P < 0.05$ .

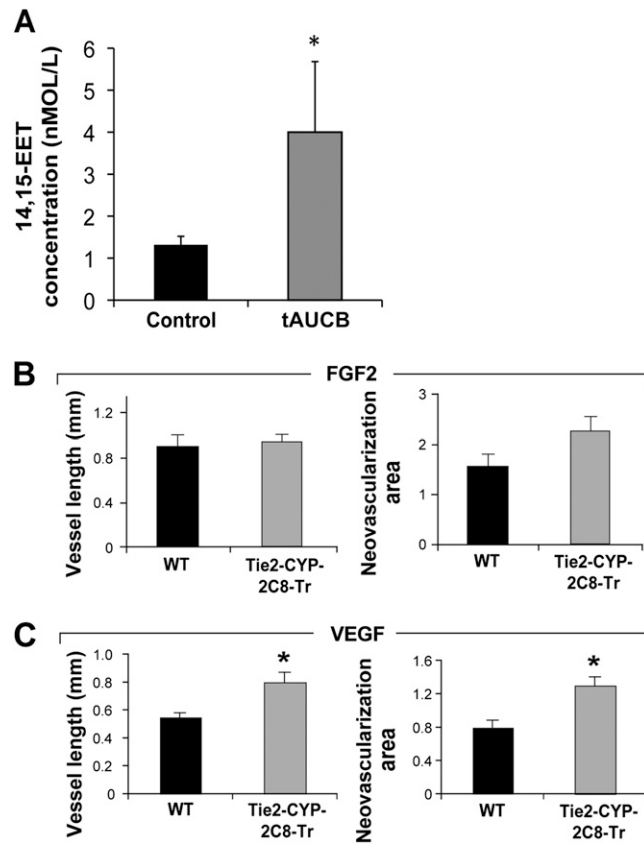

**Fig. S2.** Pharmacological manipulation of EETs and their action in organ regeneration. (A) Systemic administration of the soluble epoxide hydrolase inhibitor (sEHi){trans-4-[4-(3-adamantan-1-ylureido)cyclohexyloxy]-benzoic acid} (tAUCB, UC1471) ( $10 \text{ mg}\cdot\text{kg}^{-1}\cdot\text{d}^{-1}$ ) increases 14,15-EET plasma levels. (B) FGF-2 (80 ng) induces no significant change in vessel length and neovascularization area in Tie2-CYP2C8-Tr mice vs. WT mice. (C) VEGF-induced corneal angiogenesis is increased in Tie2-CYP2C8-Tr mice. VEGF (160 ng) significantly stimulates vessel length and neovascularization area in Tie2-CYP2C8-Tr vs. WT mice. Vessel length and area of neovascularization in Tie2-CYP2C8-Tr and WT mice are represented in bar graphs (mean  $\pm$  SEM). Neovascularization area is determined on day 6 by the formula  $0.2 \times \pi \times \text{neovessel length} \times \text{clock hours of neovessels}$  ( $n = 6$  eyes per group; experiment was performed three times). \* $P < 0.05$  vs. WT.

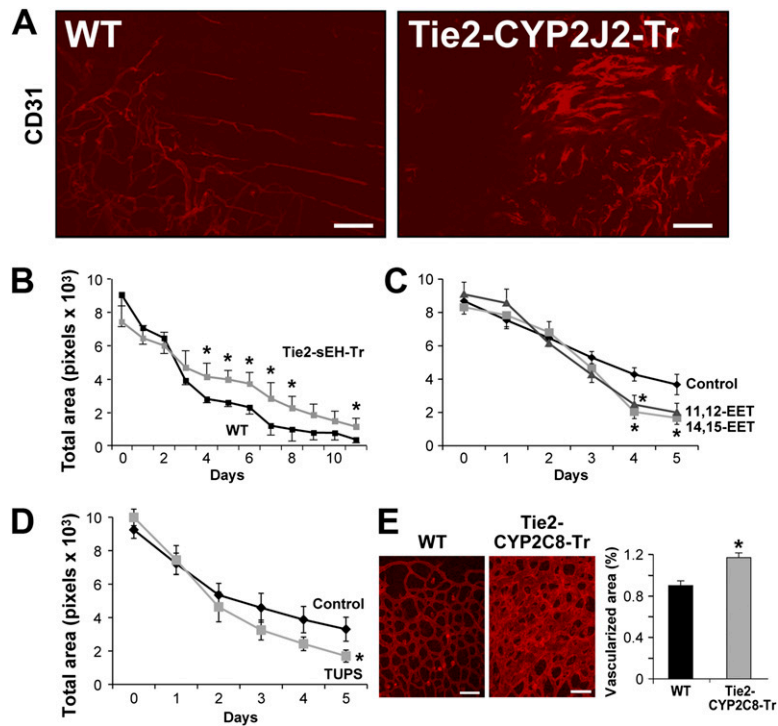

**Fig. 53.** Endothelial-derived EETs accelerate wound healing and vessel formation. (A) Whole-mount immunofluorescent staining (CD31) of wounds on day 10 shows increased vascularization in Tie2-CYP2J2-Tr compared with WT mice. (Scale bars, 100  $\mu\text{m}$ .) (B) Time course of delayed wound healing in Tie2-sEH-Tr mice.  $n = 8$  wounds per group.  $*P < 0.05$  vs. WT. (C) Systemic administration of 14,15- or 11,12-EET ( $15 \mu\text{g}\cdot\text{kg}^{-1}\cdot\text{d}^{-1}$ ) via minipump stimulates wound healing on day 5 compared with vehicle-treated mice.  $n = 10$  wounds per group.  $*P < 0.05$  vs. vehicle. (D) Topical application of the sEH inhibitor 1-(1-methylsulfonyl-piperidin-4-yl)-3-(4-(399-trifluoromethoxy-phenyl)-urea (TUPS, UC1709) (0.1% cream) accelerates wound healing on day 5 compared with vehicle-treated mice.  $n = 8$ –10 wounds per group.  $*P < 0.05$  vs. vehicle. (E) Neonatal retinal vessel formation is increased in Tie2-CYP2C8-Tr mice relative to WT mice. Confocal fluorescence micrograph of vessels stained with Alexa 594-isolectin on postnatal day 5.  $n = 7$  pups per group.  $*P < 0.05$  vs. WT. (Scale bars, 100  $\mu\text{m}$ .)
